# Supplementary material for: Polarity flipping in an isotype heterojunction (p-SnS/p-Si) to enable a broadband wavelength selective energy-efficient photodetector
Source: Royal Society of Chemistry journal article supplement (doi:10.1039/c8tc02188k), 2018-01-01
Supplement: c8tc02188k1.pdf [file c8tc02188k1.pdf]

## Supporting Information

# Polarity Flipping in Iso-Type Heterojunction (p-SnS/p-Si) to Enable a Broadband Wavelength Selective Energy-Efficient Photodetector

*Malkeshkumar Patel,<sup>a,b</sup> Mohit Kumar,<sup>a,b</sup> and Joondong Kim<sup>a,b,\*</sup>*

<sup>a</sup> Photoelectric and Energy Device Application Lab (PEDAL), Multidisciplinary Core Institute for Future Energies (MCIFE), Incheon National University, 119 Academy Rd. Yeonsu, Incheon, 22012, Republic of Korea

<sup>b</sup> Department of Electrical Engineering, Incheon National University, 119 Academy Rd. Yeonsu, Incheon, 22012, Republic of Korea

\* Email: [joonkim@incheon.ac.kr](mailto:joonkim@incheon.ac.kr)

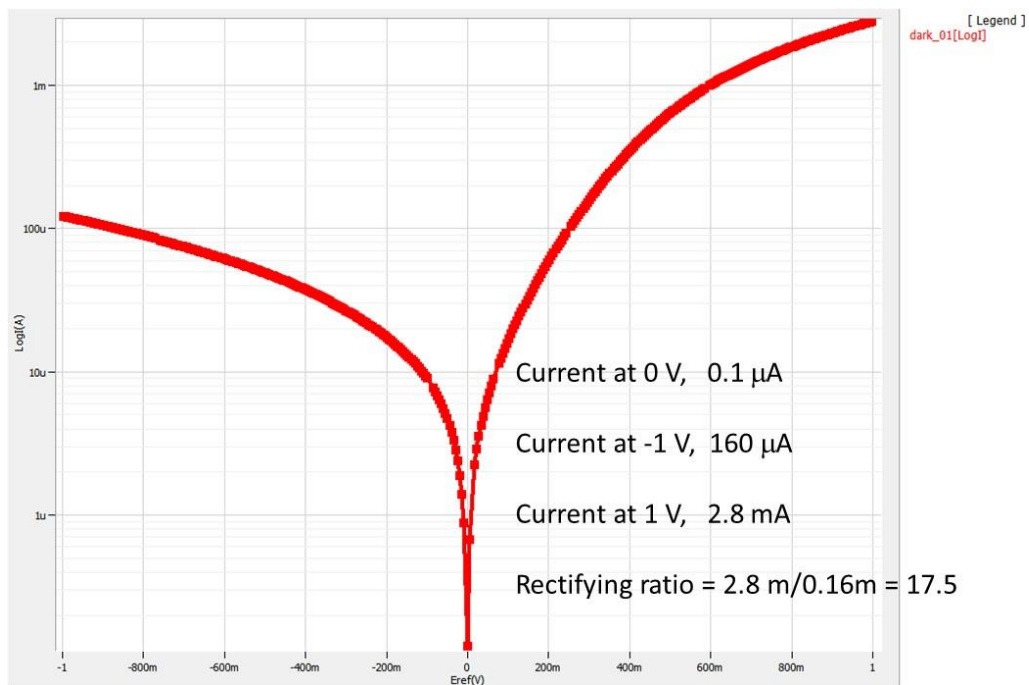

**Fig. S1** Dark I-V characteristics of p-p isotype heterojunction (p-Si/p-SnS) device.

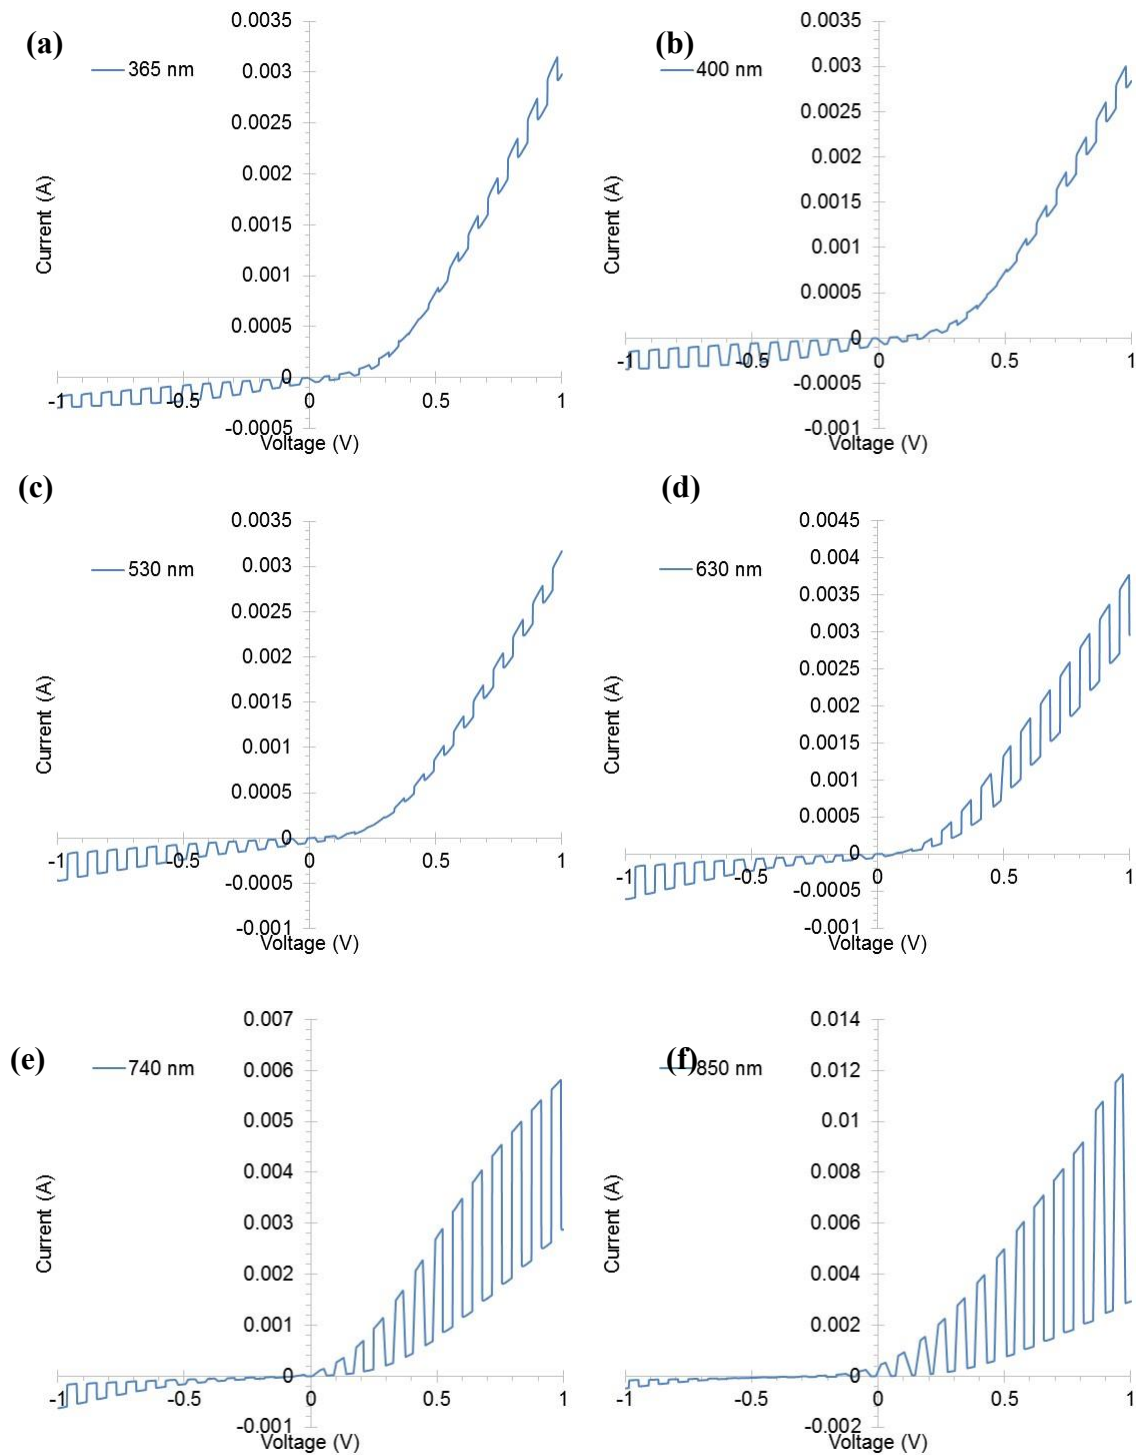

**Fig. S2** Current-voltage characteristics of the device under the pulsed light illumination, (a)  $\lambda = 365$  nm, (b)  $\lambda = 400$  nm, (c)  $\lambda = 530$  nm, (d)  $\lambda = 630$  nm, (e)  $\lambda = 740$  nm, and (f)  $\lambda = 850$  nm. Scan direction is -1 V to 1 V, scan rate is  $100 \text{ mV s}^{-1}$ , scan interval is 1 mV, and light pulse frequency 1.3 Hz.

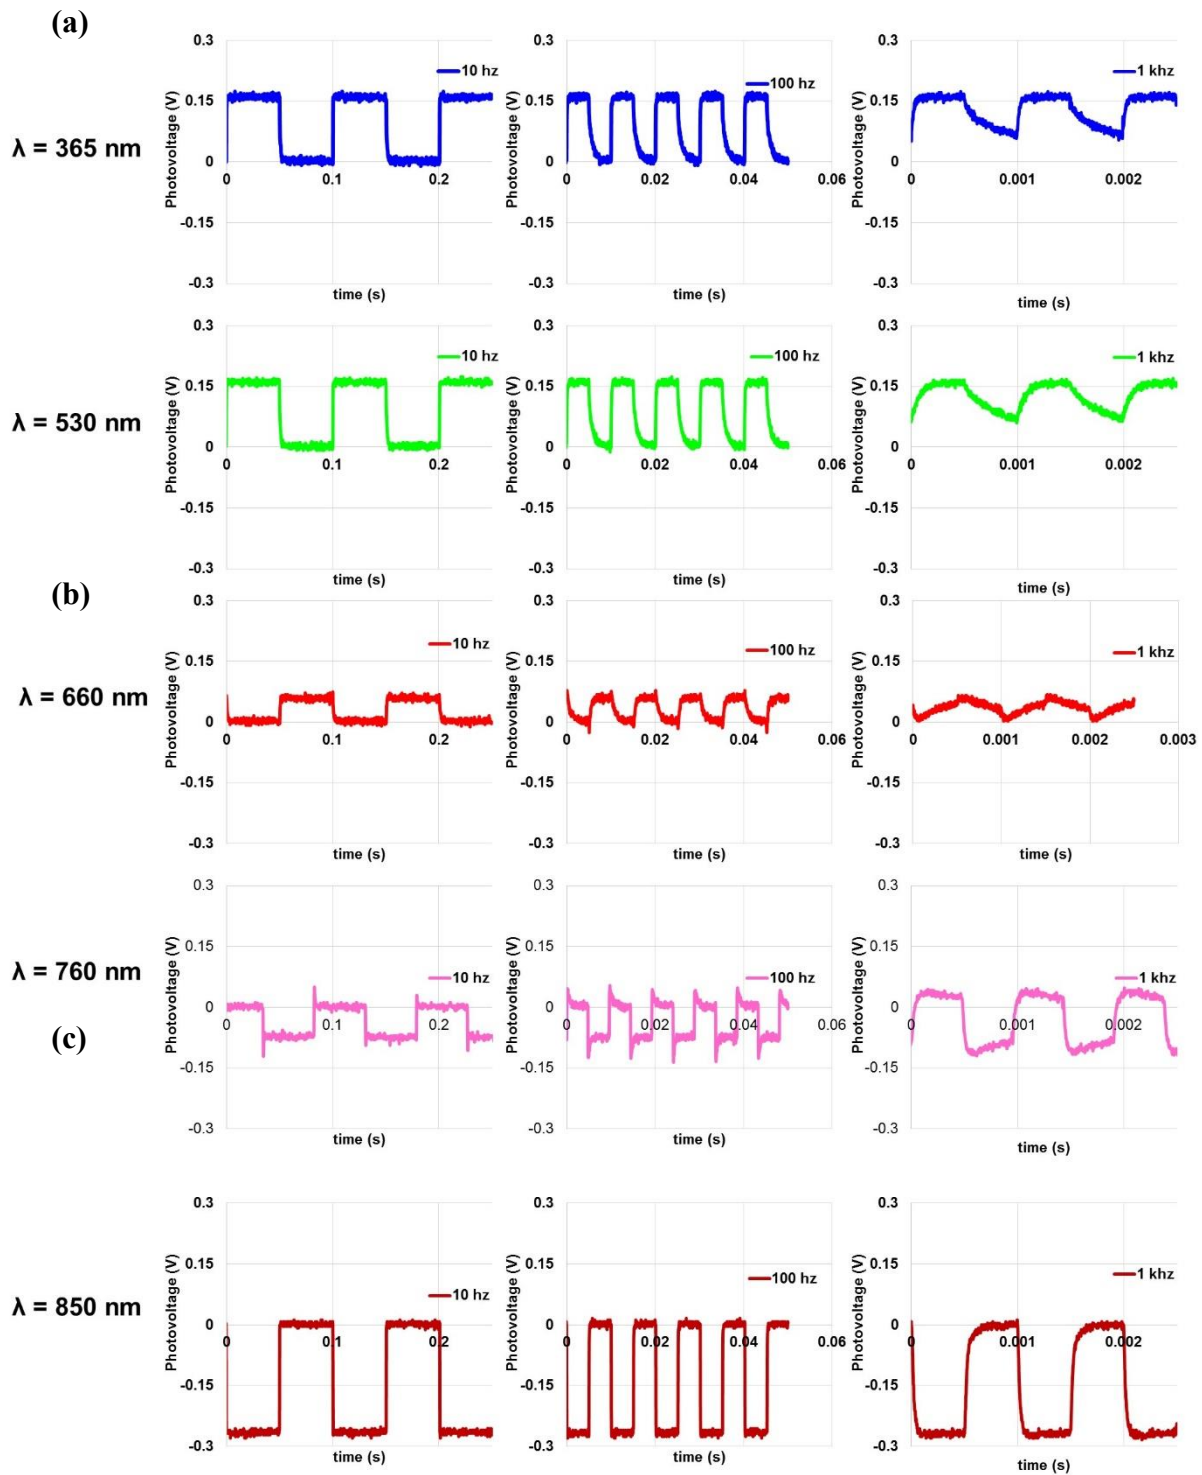

**Fig. S3** Transient photovoltage plots of the device under various pulsed frequency (10 Hz, 100 Hz and 1 kHz) of light illumination, (a)  $\lambda = 365$  nm, (b)  $\lambda = 530$  nm, (c)  $\lambda = 660$  nm, and (d)  $\lambda = 760$  nm, and (e)  $\lambda = 850$  nm.

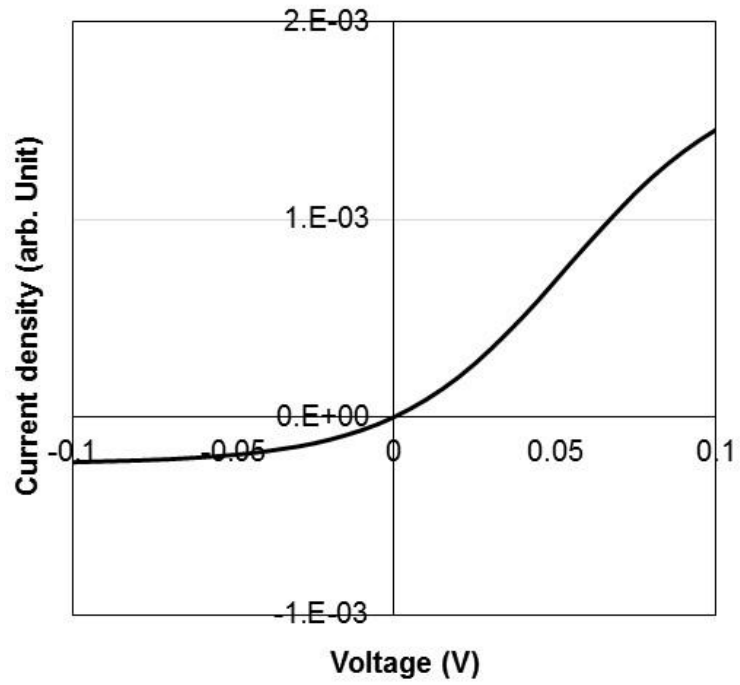

**Fig. S4** Simulated J-V characteristic of the device under dark condition.

**Table S1.** Hall measurement of the 100 nm-thick SnS film.

| # of scan      | Bulk Con. (cm <sup>-3</sup> ) | Resistivity (Ω cm) | Mobility (cm <sup>2</sup> V <sup>-1</sup> s <sup>-1</sup> ) |
|----------------|-------------------------------|--------------------|-------------------------------------------------------------|
| 1              | 1.84 × 10 <sup>17</sup>       | 65.08              | 5.19                                                        |
| 2              | 1.40 × 10 <sup>17</sup>       | 65.21              | 6.83                                                        |
| 3              | 1.57 × 10 <sup>17</sup>       | 65.24              | 6.07                                                        |
| <b>Average</b> | 1.60 × 10 <sup>17</sup>       | 65.18              | 6.03                                                        |

**Table S2.** Responsivity (R\*) and detectivity (D\*) for wavelength of 400 nm and 800 nm. The photo-induced  $R_{ph}^*$  and  $D_{ph}^*$  values calculated using the relation  $R_{ph}^* = |J_{ph} - J_{dark}|/P_{in}$  and  $D_{ph}^* = R_{ph}^*/\sqrt{2qJ_{dark}}$ , respectively, where  $J_{ph}$  is the photo current density,  $J_{dark}$  is the dark current density,  $P_{in}$  is the incident light intensity, and  $q$  is electron charge. Considering the pyroelectric effect,  $R_{ph+py}^*$  and  $D_{ph+py}^*$  can be formed by  $R_{ph+py}^* = |J_{ph+py} - J_{dark}|/P_{in}$  and  $D_{ph+py}^* = R_{ph+py}^*/\sqrt{2qJ_{dark}}$ .

| Wavelength (nm) | Light intensity (mW cm <sup>-2</sup> ) | Photo-induced                          |                          | Photo+Pyro-induced                        |                             |
|-----------------|----------------------------------------|----------------------------------------|--------------------------|-------------------------------------------|-----------------------------|
|                 |                                        | R* <sub>ph</sub> (mA W <sup>-1</sup> ) | D* <sub>ph</sub> (Jones) | R* <sub>ph+py</sub> (mA W <sup>-1</sup> ) | D* <sub>ph+py</sub> (Jones) |
| 400 nm          | 10                                     | 34.45                                  | 1.97 × 10 <sup>13</sup>  | 66.25                                     | 3.79 × 10 <sup>13</sup>     |
| 800 nm          | 150                                    | 11.44                                  | 5.93 × 10 <sup>12</sup>  | 14.80                                     | 7.68 × 10 <sup>12</sup>     |
